# Supplementary material for: mRNA Inventory of Extracellular Vesicles from Ustilago maydis
Source: MDPI journal article supplement (doi:10.3390/jof7070562), 2021-07-14
Supplement: s1 [file s1]

(a)

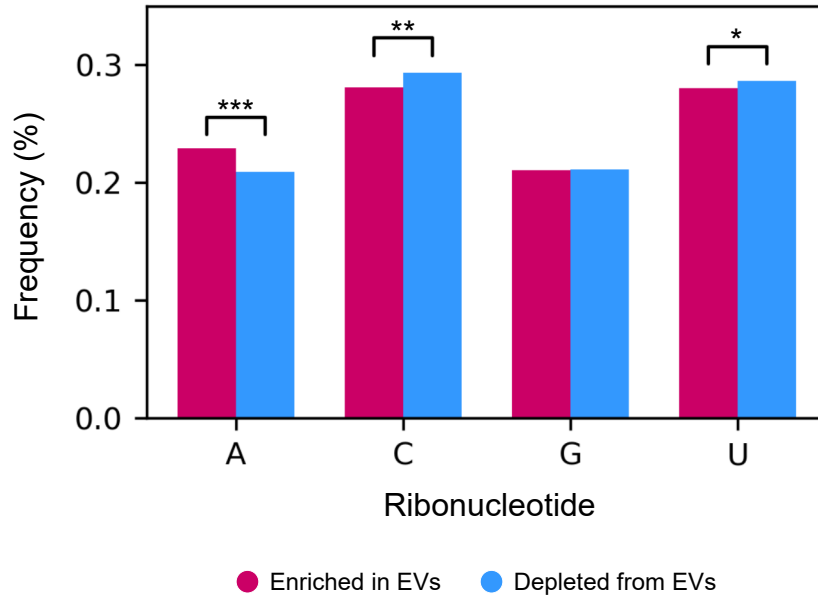

(b)

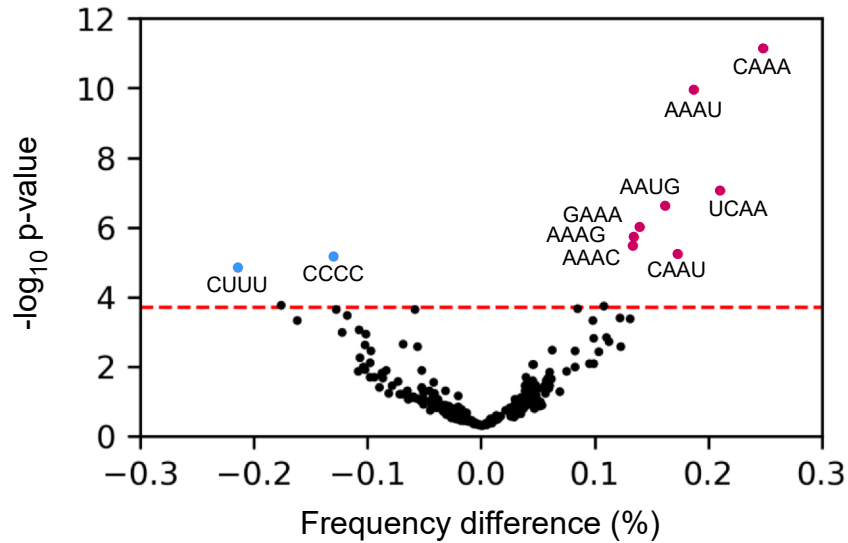

**Figure S2.** Overrepresented nucleotides and k-mers in the 3'UTRs of mRNAs enriched in EVs. **(a)** Single nucleotide frequency differences between enriched (red) and depleted (blue) sequences. Asterisks indicate significance (\*  $p = 0.0096$ , \*\*  $p = 1.1 \times 10^{-7}$ , \*\*\*  $p = 1.3 \times 10^{-19}$ ). **(b)** p-value ( $-\log_{10}$ ) as a function of 4-mer frequency differences between enriched and depleted sequences. Positive values indicate increased frequency of a 4-mer in enriched UTRs than in depleted UTRs. 4-mers whose frequency differs significantly between enriched and depleted 3'UTRs are above the red dotted line ( $p < 0.05$  and Bonferroni correction).
