# Supplementary material for: mRNA Inventory of Extracellular Vesicles from Ustilago maydis
Source: MDPI journal article supplement (doi:10.3390/jof7070562), 2021-07-14
Supplement: s1 [file s1]

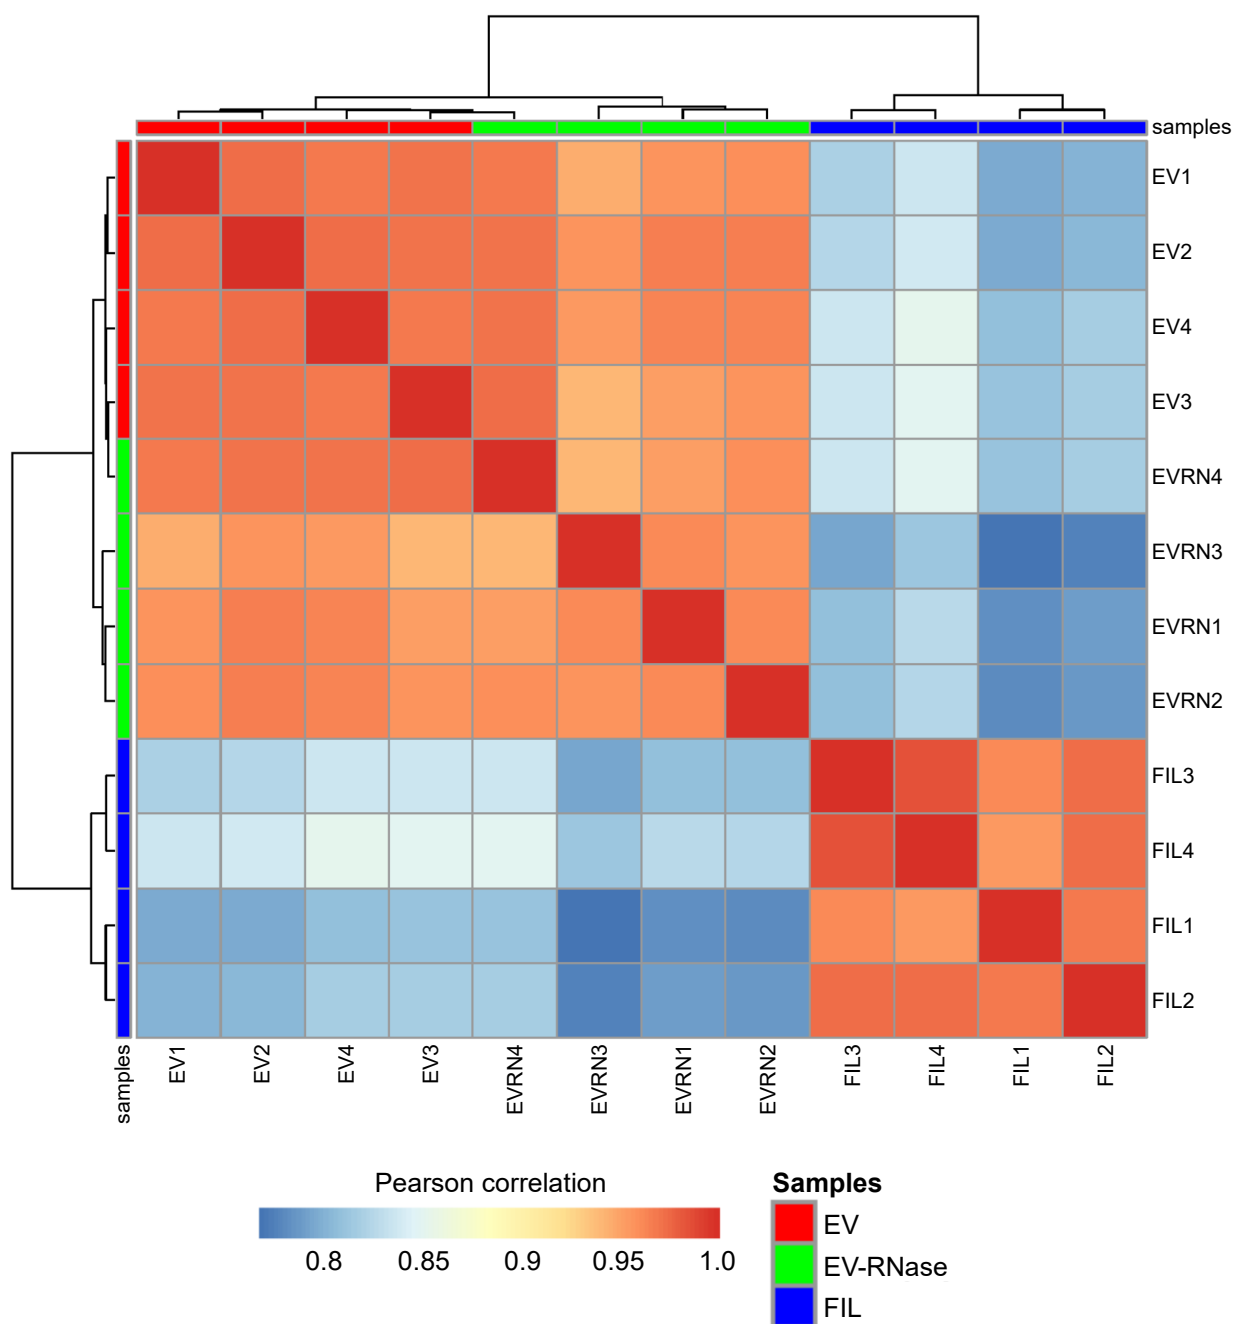

**Figure S1.** Heatmap showing Pearson correlation between the biological replicates of mock- and RNase- treated EV samples and the corresponding filament samples sequenced.
