# Supplementary material for: mRNA Inventory of Extracellular Vesicles from Ustilago maydis
Source: J Fungi (Basel). 2021 Jul 14;7(7):562. doi: 10.3390/jof7070562 (PMC8306574; doi:10.3390/jof7070562)
Supplement: Supplementary file 1 [file jof-07-00562-s001.zip]

Archive with 7 entries (7 files):
- Supplementary files revised/Figure S1.pdf
- Supplementary files revised/Figure S2.pdf
- Supplementary files revised/Table_S1_Differential_enrichment_in_EVs_filaments.xlsx
- Supplementary files revised/Table_S2_Primers_used_in_this_study.xlsx
- Supplementary files revised/Table_S3_Overrepresented_GO_terms.xlsx
- Supplementary files revised/Table_S4_Secreted_virulence_proteins.xlsx
- Supplementary files revised/Table_S5_161_Transcripts_enriched_in_EVs_upregulated_during_infection.xlsx
