# Supplementary material for: mRNA Inventory of Extracellular Vesicles from Ustilago maydis
Source: J Fungi (Basel). 2021 Jul 14;7(7):562. doi: 10.3390/jof7070562 (PMC8306574; doi:10.3390/jof7070562)
Supplement: Supplementary file 1 [file jof-07-00562-s001.zip › Supplementary files revised/Table_S2_Primers_used_in_this_study.xlsx]

## Sheet: Tabelle1
Table S2. Primers used in this study
Purpose	Target transcript	Forward / Reverse	Sequence
qPCR	UMAG_02984	Forward	GCCTACATCCAGATTGGCTATG
qPCR	UMAG_02984	Reverse	GTTGTTCTTCCGTGATTGCTTG
qPCR	UMAG_04370	Forward	TCCGACATTGTGTCTTCTCAC
qPCR	UMAG_04370	Reverse	GATGGTCGAGACTTCTCCTTTG
qPCR	UMAG_11400	Forward	CTCAGTTCAGCGGGTCTAATC
qPCR	UMAG_11400	Reverse	GAGGCTGTCGTACAGCTTAAT
qPCR	UMAG_01171	Forward	CGTGGCTGTAATTGGAGTGTAT
qPCR	UMAG_01171	Reverse	CGCTTCTGGATCTTCGTTCTT
qPCR	UMAG_02361	Forward	CGCCTTTGTCATGGCTACT
qPCR	UMAG_02361	Reverse	GCTGAACGTACTGGTTCTCTT
Full-length PCR	UMAG_02984	Forward	GCACCTACCGCCACGAC
Full-length PCR	UMAG_02984	Reverse	AGGTGTACCAGGTGGGAGTG
Full-length PCR	UMAG_04370	Forward	TCCACTCTTCCGCCCATC
Full-length PCR	UMAG_04370	Reverse	ATCACTCTCCGTCCAGAGG
Full-length PCR	UMAG_11400	Forward	ATGACACCTCCCACCGC
Full-length PCR	UMAG_11400	Reverse	TCAGTGCTTGAGACCGACTAC
Full-length PCR	UMAG_01171	Forward	ATGGCGCCTCAGATCCTC
Full-length PCR	UMAG_01171	Reverse	GACTCCTTGGCAGCTTCG
