# Supplementary material for: mRNA Inventory of Extracellular Vesicles from Ustilago maydis
Source: J Fungi (Basel). 2021 Jul 14;7(7):562. doi: 10.3390/jof7070562 (PMC8306574; doi:10.3390/jof7070562)
Supplement: Supplementary file 1 [file jof-07-00562-s001.zip › Supplementary files revised/Table_S5_161_Transcripts_enriched_in_EVs_upregulated_during_infection.xlsx]

## Sheet: Table S4
Table S5. 161 Transcripts enriched in EVs and upregulated during infection			Axenic EVs & 15-16 hpi filaments data from this study													Infection data from Lanver et al. (2018)
GeneID	TranscriptID	Pedant annotation	EV_baseMean	Fil_baseMean	baseMean	log2FC_EVvsFil	lfcSE	pvalue	padj	EV_TPMmean	EV_TPMstdev	Fil_TPMmean	Fil_TPMstdev	Full CDS coverage in EVs	Full CDS coverage in Filaments	Peak expression timepoint (dpi)	Lanver module
UMAG_02215	KIS69684	related to dibenzothiophene desulfurizing enzyme	146.26	0.485886	73.3732	8.00612	0.9837	2.01823e-15	1.6441e-14	63.4309	16.5472	0.288054	0.356576	Y	N	2	magenta
UMAG_02984	KIS69005	related to Dibenzothiophene desulfurization enzyme C	663.246	4.81058	334.028	7.08057	0.346211	1.03028e-92	3.69757e-90	334.609	15.9425	3.13797	0.436048	Y	N	4	magenta
UMAG_03995	KIS67946	related to JLP1 - Fe(II)-dependent sulfonate/alpha-ketoglutarate dioxygenase	1064.28	19.1152	541.7	5.78	0.228222	2.73583e-142	3.53469e-139	575.13	64.0295	12.9483	4.41375	Y	Y	4	magenta
UMAG_04370	KIS67267	hypothetical protein	484.702	12.5832	248.642	5.25276	0.267983	1.91471e-86	5.15375e-84	256.171	34.8055	8.25086	3.26897	Y	N	2	magenta
UMAG_06042	KIS65953	hypothetical protein	334.983	11.2056	173.094	4.87267	0.252592	2.06318e-83	5.12621e-81	184.818	2.3749	7.82123	2.59926	Y	N	4	magenta
UMAG_02006	KIS70861	hypothetical protein	665.804	34.8513	350.328	4.23946	0.209151	1.84562e-92	5.96136e-90	497.818	78.0717	32.8609	5.63307	Y	Y	1	red
UMAG_11874	KIS71550	hypothetical protein (C-terminal fragment)	75.9846	4.04722	40.0159	4.13894	0.436967	5.60765e-22	7.90948e-21	57.3038	18.6435	4.00419	1.53192	N	N	12	cyan
UMAG_06404	KIS65704	probable thioredoxin peroxidase	7089.02	575.659	3832.34	3.61154	0.14447	5.16544e-139	5.56146e-136	7146.74	697.755	737.209	117.811	Y	Y	2	light-green
UMAG_10260	KIS70688	related to MXR1 - protein-methionine-s-oxide reductase	340.257	34.9247	187.591	3.25871	0.214403	3.5548e-53	3.14575e-51	352.279	49.9552	45.7017	12.1374	Y	Y	2	cyan
UMAG_03524	KIS68435	related to peroxisomal amine oxidase (copper-containing)	104.688	10.7828	57.7353	3.22329	0.322479	1.8819e-24	3.26803e-23	28.6474	8.02954	3.68943	0.741089	N	N	0.5	light-cyan
UMAG_05581	KIS66592	probable O-acetylhomoserine (thiol)-lyase	2389.87	257.144	1323.51	3.19502	0.191186	8.94457e-64	1.37576e-61	1183.08	127.186	161.956	46.9151	Y	Y	1	magenta
UMAG_01232	KIS71332	related to LAP3 - member of the GAL regulon	3447.93	383.273	1915.6	3.15615	0.151961	6.86202e-97	2.77054e-94	1383.4	101.846	195.255	36.3613	Y	Y	0.5	light-cyan
UMAG_04292	KIS67798	hypothetical protein	34.6299	4.29277	19.4613	2.88376	0.459219	4.97923e-11	2.68049e-10	46.4414	12.6754	7.26877	3.05699	Y	Y	1	red
UMAG_03250	KIS68678	hypothetical protein	3467.12	505.639	1986.38	2.75973	0.169156	7.43673e-61	1.04437e-58	506.792	119.958	93.5704	10.705	Y	Y	0.5	red
UMAG_02429	KIS69915	hypothetical protein	1622.25	268.652	945.451	2.5732	0.178136	2.7676e-48	1.96469e-46	425.814	74.7128	89.2774	18.9813	Y	Y	6	magenta
UMAG_03753	KIS68173	hypothetical protein	37.7033	5.95363	21.8285	2.53511	0.437804	9.23039e-10	4.37479e-09	23.2403	8.10889	4.54467	1.80458	N	N	4	cyan
UMAG_10465	KIS72148	probable FAB1 - phosphatidylinositol 3-phosphate 5-kinase	2993.24	556.231	1774.74	2.41071	0.157612	9.18246e-54	8.6805e-52	234.639	32.0689	55.3369	10.6242	N	Y	6	magenta
UMAG_00288	KIS71860	related to trna methyltransferase	101.414	19.1205	60.2671	2.365	0.243758	4.30673e-23	6.60842e-22	46.9387	5.00385	11.3213	2.16243	Y	N	4	magenta
UMAG_11033	KIS66145	hypothetical protein	164.544	31.3078	97.926	2.34707	0.258078	1.16359e-20	1.45675e-19	135.124	20.5219	32.8398	13.0981	Y	Y	0.5	dark-green
UMAG_01812	KIS70648	hypothetical protein	599.442	120.99	360.216	2.29392	0.14259	3.97084e-59	5.23503e-57	288.39	18.2812	73.9453	11.0828	Y	Y	0.5	dark-green
UMAG_01771	KIS70606	hypothetical protein	116.488	23.4892	69.9885	2.26498	0.256522	1.39985e-19	1.62644e-18	169.17	27.8973	43.4563	12.1585	Y	Y	4	cyan
UMAG_02223	KIS69693	related to acid phosphatase	56.7582	11.2701	34.0142	2.25946	0.326105	6.07238e-13	3.98654e-12	27.2002	6.77213	6.98905	1.54983	N	N	0.5	dark-green
UMAG_04484	KIS67382	probable choline-sulfatase	454.348	97.3245	275.836	2.18476	0.228792	1.64501e-22	2.42068e-21	161.128	13.4761	43.8066	16.5935	Y	Y	2	magenta
UMAG_10080	KIS69716	probable theta class glutathione s-transferase	244.632	54.8293	149.731	2.13411	0.180157	3.20388e-33	9.36518e-32	207.338	13.8743	59.0101	10.2273	Y	Y	12	beige
UMAG_01235	KIS71335	hypothetical protein	87.5402	19.3824	53.4613	2.13017	0.248052	1.39145e-18	1.45921e-17	34.2152	1.27971	9.55998	2.26931	N	N	4	cyan
UMAG_02888	KIS68902	related to ADH6 - NADPH-dependent alcohol dehydrogenase	30.5393	6.68363	18.6115	2.07063	0.403464	4.58688e-08	1.78825e-07	18.6186	2.69267	5.22148	2.49454	Y	N	4	cyan
UMAG_11430	KIS72077	related to CSR1 - phosphatidylinositol transfer protein	270.3	63.3067	166.803	2.06603	0.190239	2.57982e-28	5.68794e-27	104.002	9.51708	30.8762	8.00517	Y	Y	0.5	light-cyan
UMAG_11981	KIS67390	hypothetical protein	349.579	87.1899	218.384	1.97351	0.198646	4.3279e-24	7.18721e-23	315.807	26.1512	99.8342	28.6671	Y	Y	8	light-cyan
UMAG_05883	KIS66144	hypothetical protein	131.937	34.5968	83.2671	1.88621	0.23525	1.79039e-16	1.57789e-15	115.846	7.73774	38.5715	13.7356	Y	Y	0.5	dark-green
UMAG_10177	KIS70049	guanine nucleotide-binding protein alpha-1 subunit	1342.76	365.366	854.063	1.85128	0.18356	1.02381e-24	1.84229e-23	849.87	52.0437	292.863	78.2435	Y	Y	12	dark-green
UMAG_01881	KIS70726	related to Oxidoreductase	401.033	112.778	256.906	1.79672	0.204756	2.8562e-19	3.23702e-18	263.529	20.1583	94.0209	28.8906	Y	Y	4	light-cyan
UMAG_10431	KIS67786	hypothetical protein	679.736	192.685	436.211	1.78966	0.188672	4.09377e-22	5.83792e-21	200.613	46.8173	72.212	14.2759	Y	Y	12	magenta
UMAG_12052	KIS72159	b mating type locus	2744.37	781.063	1762.71	1.78273	0.192651	3.6258e-21	4.75551e-20	1297.32	283.533	469.263	103.179	Y	Y	4	magenta
UMAG_01850	KIS70692	hypothetical protein	455.034	130.743	292.888	1.77177	0.185247	1.94826e-22	2.84103e-21	539.148	109.019	196.473	28.7743	Y	Y	0.5	red
UMAG_12166	KIS70666	related to SPC1 - signal peptidase 10.8 kDa subunit	87.5228	24.9721	56.2474	1.75713	0.261011	3.00766e-12	1.8278e-11	225.704	44.9268	81.1579	19.896	Y	Y	8	cyan
UMAG_01799	KIS70634	hypothetical protein	1748.17	506.858	1127.52	1.75502	0.196985	8.83189e-20	1.04495e-18	1154.2	100.952	422.694	114.841	Y	Y	0.5	red
UMAG_04415	KIS67314	hypothetical protein	145.793	42.4553	94.1243	1.75202	0.191783	1.21506e-20	1.51824e-19	83.9673	6.8142	30.8958	2.9853	Y	Y	2	magenta
UMAG_02492	KIS69980	hypothetical protein	192.556	56.4636	124.51	1.74591	0.181179	1.01665e-22	1.5238e-21	92.8566	9.34086	34.3279	3.46094	Y	Y	4	magenta
UMAG_01171	KIS71271	related to 4-coumarate-CoA ligase	236.924	69.5561	153.24	1.74333	0.172666	1.06798e-24	1.91643e-23	95.1708	12.0228	35.4745	4.21467	Y	Y	8	cyan
UMAG_05659	KIS66873	hypothetical protein	831.017	254.693	542.855	1.68871	0.141633	1.73049e-33	5.24833e-32	170.564	15.8334	66.4478	11.3585	Y	Y	8	light-cyan
UMAG_02669	KIS69328	hypothetical protein	119.115	35.8634	77.4894	1.68584	0.223475	9.16997e-15	7.18036e-14	86.6704	8.72574	33.2351	10.6588	Y	Y	12	cyan
UMAG_02985	KIS69006	hypothetical protein	270.466	83.3789	176.923	1.66333	0.202332	3.89278e-17	3.66046e-16	118.954	17.9375	46.5152	11.1505	Y	Y	2	magenta
UMAG_02978	KIS68999	hypothetical protein	782.663	242.153	512.408	1.64166	0.247995	6.70933e-12	3.93663e-11	470.137	75.3521	183.759	70.9713	Y	Y	1	dark-green
UMAG_11249	KIS70920	related to cyclopropane-fatty-acyl-phospholipid synthase	136.008	40.6287	88.3184	1.63971	0.355325	7.07599e-07	2.39575e-06	61.2848	15.38	23.3046	16.0489	Y	Y	0.5	dark-green
UMAG_03688	KIS68109	probable fatty alcohol oxidase	91.4448	28.5185	59.9817	1.63242	0.244453	4.90401e-12	2.9198e-11	60.2624	13.6764	23.5891	2.81601	Y	Y	1	red
UMAG_00442	KIS72020	hypothetical protein	73.1438	22.2735	47.7086	1.62565	0.331481	1.78013e-07	6.37454e-07	18.537	2.14064	7.16559	4.18927	N	N	2	magenta
UMAG_12312	KIS66896	hypothetical protein	2394.65	769.59	1582.12	1.61954	0.14534	1.5334e-29	3.69618e-28	370.748	47.5727	151.38	25.8062	N	Y	0.5	red
UMAG_11131	KIS67707	hypothetical protein	124.766	39.9793	82.3728	1.60505	0.21081	5.58696e-15	4.43388e-14	236.733	12.3299	96.0809	24.3295	Y	Y	1	red
UMAG_02801	KIS69470	probable NADP-specific glutamate dehydrogenase	9252.36	2976.86	6114.61	1.60389	0.195559	4.71821e-17	4.41733e-16	4545.01	303.236	1850.9	540.085	Y	Y	0.5	dark-green
UMAG_03523	KIS68434	probable aldehyde dehydrogenase	114.968	37.8311	76.3995	1.5659	0.213117	4.4091e-14	3.2589e-13	49.1981	5.5534	20.5184	3.34875	Y	Y	12	light-cyan
UMAG_10596	KIS69434	probable aldehyde dehydrogenase	481.085	157.865	319.475	1.56569	0.225277	7.42073e-13	4.84711e-12	210.086	12.7249	86.9294	29.9116	Y	Y	4	cyan
UMAG_02149	KIS69614	hypothetical protein	61.1118	19.785	40.4484	1.55973	0.27709	3.98934e-09	1.75076e-08	21.102	2.21824	8.59104	3.17342	Y	Y	4	cyan
UMAG_11276	KIS71161	hypothetical protein	896.738	301.715	599.227	1.5583	0.125918	7.67372e-36	2.78496e-34	1187.15	77.9661	506.322	38.0207	Y	Y	2	light-green
UMAG_02410	KIS69894	hypothetical protein	29.2679	9.32737	19.2976	1.54612	0.351296	2.42252e-06	7.64134e-06	31.7724	2.12189	12.6587	1.31277	N	Y	4	magenta
UMAG_10530	KIS67338	hypothetical protein	20.782	6.4039	13.5929	1.52627	0.445018	0.000129265	0.000310658	16.3149	4.27168	6.50268	2.41299	N	N	6	cyan
UMAG_00816	KIS72417	probable thiamine biosynthesis protein nmt1	3621.61	1237.9	2429.76	1.51806	0.189069	2.11943e-16	1.85773e-15	2252.86	516.631	971.597	136.222	Y	Y	2	magenta
UMAG_01933	KIS70781	hypothetical protein	230.058	78.8182	154.438	1.50849	0.212065	2.47976e-13	1.68093e-12	291.488	26.572	125.914	37.6572	Y	Y	0.5	red
UMAG_10175	KIS70046	probable sphingosine-1-phosphate lyase	395.874	119.249	257.562	1.50552	0.524402	0.00072502	0.00155602	151.381	123.266	57.3966	2.80759	Y	Y	12	cyan
UMAG_04801	KIS66737	related to Glutathione S-transferase II	143.266	49.2086	96.2373	1.50449	0.205945	6.38497e-14	4.62409e-13	141.696	28.5791	61.5992	9.31396	Y	Y	8	light-cyan
UMAG_12007	KIS66824	related to cellulase	128.335	44.4241	86.3795	1.47975	0.247807	5.30515e-10	2.59238e-09	61.3428	18.0878	26.8067	3.52976	N	N	1	light-cyan
UMAG_00146	KIS71707	hypothetical protein	79.5483	27.6396	53.5939	1.47052	0.259688	3.45523e-09	1.52882e-08	79.5876	16.8325	34.853	6.26716	Y	Y	0.5	light-cyan
UMAG_10392	KIS68606	hypothetical protein	284.456	101.281	192.869	1.47043	0.151224	5.7215e-23	8.67626e-22	169.356	16.4299	76.5336	4.21157	Y	Y	8	magenta
UMAG_06153	KIS65772	related to 4-coumarate--CoA ligase 1	106.283	37.549	71.9158	1.46597	0.200956	7.37074e-14	5.27882e-13	41.5306	4.04578	18.5315	1.45752	N	Y	4	cyan
UMAG_01540	KIS70370	related to FMO1 - flavin-containing monooxygenase	521.854	187.811	354.833	1.45839	0.13572	1.49905e-27	3.16465e-26	201.515	17.422	91.9901	8.04669	Y	Y	2	light-green
UMAG_10416	KIS67755	hypothetical protein	230.569	81.5645	156.067	1.45699	0.212512	1.69707e-12	1.06026e-11	119.014	11.6544	53.8396	19.1208	Y	Y	0.5	red
UMAG_05901	KIS66163	related to BOS1 - vesicle specific SNAP receptor	97.0544	34.6338	65.8441	1.44747	0.208983	1.08847e-12	6.9896e-12	81.61	7.25476	36.7587	5.31551	Y	Y	2	light-green
UMAG_12299	KIS70003	hypothetical protein	84.9373	30.1861	57.5617	1.44723	0.232075	1.10124e-10	5.74171e-10	105.213	14.8379	47.4794	6.15905	Y	Y	8	light-cyan
UMAG_11300	KIS65781	hypothetical protein	530.911	192.907	361.909	1.43923	0.154588	3.14329e-21	4.17812e-20	454.675	63.983	209.471	32.8819	Y	Y	4	magenta
UMAG_01610	KIS70434	hypothetical protein	653.125	238.469	445.797	1.43669	0.143293	2.81597e-24	4.77459e-23	511.848	37.8669	235.989	26.535	Y	Y	12	dark-green
UMAG_01911	KIS70756	related to alcohol dehydrogenase	162.488	58.9743	110.731	1.4343	0.174685	5.60847e-17	5.21305e-16	97.808	8.50617	45.0695	5.77012	Y	Y	12	red
UMAG_00407	KIS71981	probable Tartrate dehydrogenase	112.192	40.4763	76.3341	1.43421	0.207507	1.19478e-12	7.63428e-12	69.8443	5.65289	31.8961	6.35741	Y	Y	8	cyan
UMAG_05942	KIS66207	related to monocarboxylate permease	32.361	11.1766	21.7688	1.4266	0.344296	8.43848e-06	2.4489e-05	13.1797	2.2439	5.69687	1.92389	N	N	8	cyan
UMAG_02921	KIS68936	hypothetical protein	69.8279	25.0549	47.4414	1.42514	0.243907	1.30807e-09	6.08799e-09	54.5762	6.14556	25.1586	5.14844	Y	Y	0.5	light-cyan
UMAG_04220	KIS67720	chorismate mutase	287.716	105.609	196.662	1.42391	0.164271	1.08206e-18	1.16307e-17	222.811	20.929	103.767	10.198	Y	Y	2	cyan
UMAG_01938	KIS70787	related to Epoxide hydrolase 1	105.774	38.1683	71.971	1.42282	0.230368	1.64158e-10	8.42973e-10	56.2214	12.2645	25.8589	4.09071	Y	Y	4	light-cyan
UMAG_11465	KIS69553	hypothetical protein	226.193	82.8134	154.503	1.41702	0.191853	3.88098e-14	2.88838e-13	205.527	40.8543	95.3573	16.0357	Y	Y	4	magenta
UMAG_11631	KIS72415	hypothetical protein	639.509	237.175	438.342	1.41443	0.135645	4.73201e-26	9.20746e-25	105.683	12.2815	49.7977	6.29697	N	Y	4	magenta
UMAG_10093	KIS71879	hypothetical protein	46.7067	16.7721	31.7394	1.39706	0.307654	1.40279e-06	4.59069e-06	46.9996	12.883	21.0972	2.65661	Y	Y	0.5	#N/A
UMAG_04005	KIS67957	hypothetical protein	77.5311	28.6674	53.0992	1.38862	0.228716	3.37108e-10	1.68164e-09	60.7783	7.24855	28.5307	4.33999	Y	Y	8	light-cyan
UMAG_05161	KIS70088	related to Phosducin	686.85	257.308	472.079	1.38747	0.184164	1.24227e-14	9.62241e-14	412.876	38.2826	195.456	48.3223	Y	Y	2	magenta
UMAG_15077	KIS69548	hypothetical protein	83.4095	31.0708	57.2402	1.37582	0.235235	1.31194e-09	6.09958e-09	10.5924	1.93114	4.98899	0.643116	N	N	0.5	magenta
UMAG_00538	KIS72118	hypothetical protein	22.5926	7.88532	15.239	1.37474	0.407138	0.000182912	0.00042812	14.228	3.6944	6.4172	1.95442	N	Y	8	magenta
UMAG_00304	KIS71876	probable TRP2 - anthranilate synthase component I	482.952	186.471	334.711	1.35395	0.14562	3.88535e-21	5.05017e-20	211.552	24.7243	103.664	13.6995	N	Y	4	cyan
UMAG_11190	KIS66074	hypothetical protein	137.329	52.2078	94.7682	1.34882	0.225975	6.41748e-10	3.11238e-09	162.658	23.8462	78.5969	25.2865	Y	Y	4	magenta
UMAG_02583	KIS69235	probable FAT1 - Long-chain fatty acid transporter	387.751	149.404	268.577	1.34296	0.196182	2.0247e-12	1.25163e-11	135.636	21.5798	65.8571	15.4432	Y	Y	0.5	red
UMAG_04164	KIS67660	hypothetical protein	571.323	220.179	395.751	1.34244	0.193116	9.73869e-13	6.27863e-12	165.927	13.6424	81.3764	24.2353	N	Y	8	light-cyan
UMAG_11909	KIS69507	probable RSR1 - GTP-binding protein	60.5841	22.9906	41.7874	1.34222	0.253897	3.42842e-08	1.35875e-07	61.6995	8.62422	29.731	3.87805	Y	Y	4	light-cyan
UMAG_11078	KIS68332	hypothetical protein	160.445	62.0817	111.263	1.32459	0.232159	3.10446e-09	1.385e-08	166.472	10.111	81.0339	26.9146	Y	Y	4	cyan
UMAG_10618	KIS70997	hypothetical protein	31.841	11.96	21.9005	1.31954	0.325727	1.4177e-05	3.98537e-05	26.8929	3.11935	12.8135	1.64019	Y	Y	8	magenta
UMAG_10248	KIS70646	hypothetical protein	83.4188	32.5635	57.9911	1.31697	0.215262	2.72161e-10	1.36928e-09	42.648	3.54261	21.0477	0.99198	Y	Y	1	light-cyan
UMAG_10864	KIS66221	related to GNA1 - essential acetyltransferase	21.2883	7.70068	14.4945	1.31383	0.42705	0.000540075	0.00118187	26.8361	7.16738	12.1076	4.63269	Y	Y	0.5	red
UMAG_01883	KIS70728	hypothetical protein	285.145	113.645	199.395	1.29916	0.182438	3.01267e-13	2.02727e-12	274.132	22.7319	138.172	31.0798	Y	Y	2	light-green
UMAG_01515	KIS70345	related to ECM4 - protein involved in cell wall biogenesis and architecture	494.905	198.982	346.943	1.29841	0.139244	3.17643e-21	4.2135e-20	349.745	12.089	177.441	18.4147	Y	Y	12	beige
UMAG_10370	KIS69077	related to YJU3 û monoglyceride lipase	535.228	215.36	375.294	1.298	0.135118	2.15418e-22	3.13423e-21	355.731	30.7062	181.204	8.2142	Y	Y	0.5	red
UMAG_05301	KIS66301	hypothetical protein	29.249	10.9496	20.0993	1.2957	0.367344	0.000115252	0.000279478	25.8278	4.63881	12.3623	5.0623	Y	Y	4	cyan
UMAG_00334	KIS71905	probable peroxisomal acyl-coenzyme A thioester hydrolase 1	250.767	100.615	175.691	1.29331	0.163415	7.28099e-16	6.09264e-15	150.034	5.79279	76.4639	14.1272	Y	Y	4	cyan
UMAG_11373	KIS70809	hypothetical protein	202.106	80.6849	141.396	1.29276	0.18222	3.8238e-13	2.54657e-12	171.214	22.5511	87.1403	19.747	Y	Y	0.5	dark-green
UMAG_04136	KIS67633	related to serine/threonine protein kinase	2178.92	891.291	1535.11	1.27066	0.14616	1.03674e-18	1.11996e-17	613.917	84.0586	317.746	43.5537	Y	Y	0.5	red
UMAG_01072	KIS71163	probable GOR1 û glyoxylate reductase	175.023	71.7447	123.384	1.26132	0.174459	1.45598e-13	1.00495e-12	118.448	9.79366	61.7313	6.32165	Y	Y	8	cyan
UMAG_00256	KIS71826	related to 3-oxoacyl-[acyl-carrier protein] reductase	397.513	163.947	280.73	1.25972	0.144965	1.09683e-18	1.177e-17	331.579	37.7326	173.018	14.8965	Y	Y	8	cyan
UMAG_04487	KIS67386	hypothetical protein	391.638	160.564	276.101	1.25854	0.175835	2.46426e-13	1.67217e-12	81.4692	13.4108	42.4672	7.27617	N	Y	2	light-green
UMAG_01815	KIS70651	related to carbonyl reductase	109.087	44.7415	76.9144	1.24896	0.203846	2.75755e-10	1.38628e-09	86.6416	11.0776	44.9297	4.23826	Y	Y	4	magenta
UMAG_04566	KIS67468	hypothetical protein	65.201	26.3533	45.7771	1.24331	0.269794	1.21494e-06	4.00229e-06	129.141	26.9908	66.0804	18.4767	Y	Y	0.5	light-cyan
UMAG_10801	KIS70339	hypothetical protein	515.079	215.544	365.312	1.23886	0.140114	2.94261e-19	3.32912e-18	281.16	27.4055	149.466	22.1728	Y	Y	1	light-cyan
UMAG_11134	KIS70456	related to Yippee protein	156.76	63.9856	110.373	1.23478	0.254259	3.57501e-07	1.24701e-06	315.596	53.3618	164.654	61.4188	Y	Y	0.5	light-cyan
UMAG_12006	KIS66823	related to NAD-dependent deacetylase Sirtuin 5	97.2844	40.1244	68.7044	1.23285	0.222119	8.88326e-09	3.76795e-08	74.1488	10.7261	38.8045	7.14577	Y	Y	4	magenta
UMAG_04987	KIS67120	hypothetical protein	121.714	49.9296	85.8218	1.23	0.243618	1.36351e-07	4.97643e-07	250.805	37.2453	131.628	45.9272	Y	Y	4	magenta
UMAG_01894	KIS70739	hypothetical protein	272.355	114.592	193.474	1.2279	0.156946	1.60719e-15	1.31424e-14	220.928	15.7559	118.097	16.3425	Y	Y	1	dark-green
UMAG_12230	KIS68358	hypothetical protein	55.452	22.7361	39.0941	1.22306	0.267289	1.47624e-06	4.81399e-06	36.8712	5.90975	18.9769	4.26235	Y	Y	12	#N/A
UMAG_11107	KIS68287	hypothetical protein	397.928	168.235	283.081	1.22233	0.152196	3.02427e-16	2.62239e-15	284.889	16.0913	152.246	22.6783	Y	Y	4	light-cyan
UMAG_03847	KIS68266	nitrate reductase	633.713	230.95	432.331	1.21988	0.519666	0.00463986	0.00868293	144.338	21.1119	66.4883	46.831	Y	Y	0.5	red
UMAG_10131	KIS69841	related to phosphatidylserine decarboxylase proenzyme 2 precursor	397.018	167.665	282.342	1.21853	0.165815	6.35576e-14	4.60811e-13	221.597	32.0656	118.785	21.284	Y	Y	4	magenta
UMAG_11378	KIS70825	probable Cyanate hydratase	194.258	81.9823	138.12	1.21756	0.177426	2.14845e-12	1.32433e-11	266.335	31.0019	142.349	17.5356	Y	Y	0.5	dark-green
UMAG_02014	KIS70869	hypothetical protein	217.115	91.5654	154.34	1.21467	0.185234	1.73675e-11	9.79858e-11	110.495	13.9792	59.2132	11.7284	Y	Y	0.5	light-cyan
UMAG_01576	KIS70409	hypothetical protein	68.0632	28.0473	48.0552	1.21003	0.269952	2.31897e-06	7.33262e-06	41.0622	10.3289	21.505	6.17806	Y	Y	8	cyan
UMAG_05354	KIS66356	hypothetical protein	172.517	73.3903	122.954	1.20817	0.165186	8.51129e-14	6.04208e-13	165.998	11.79	89.6195	9.92967	Y	Y	1	light-cyan
UMAG_00109	KIS71668	probable DAK2 - dihydroxyacetone kinase	906.149	385.021	645.585	1.20654	0.178424	4.33233e-12	2.59378e-11	329.681	59.3888	177.12	36.9874	Y	Y	1	dark-green
UMAG_04348	KIS67244	probable phenol 2-monooxygenase	107.781	45.7286	76.7549	1.19627	0.206106	2.1422e-09	9.72494e-09	31.5383	3.15844	17.1352	3.63679	Y	Y	0.5	light-cyan
UMAG_03144	KIS68571	probable clathrin-associated adaptor complex medium chain	204.519	87.3077	145.913	1.19353	0.190019	1.1087e-10	5.77133e-10	106.939	12.3177	58.4539	14.3945	Y	Y	2	light-green
UMAG_05390	KIS66397	related to peroxisomal membrane protein 4	38.7799	15.9709	27.3754	1.19172	0.3092	3.70238e-05	9.73437e-05	40.7076	9.2742	21.4697	4.51594	Y	Y	0.5	light-cyan
UMAG_02838	KIS68849	hypothetical protein	63.1392	26.8249	44.982	1.18514	0.238609	2.25572e-07	8.01096e-07	44.6826	4.29222	23.9036	2.1287	Y	Y	4	cyan
UMAG_02942	KIS68961	probable MET16 - 3`-phosphoadenylylsulfate reductase	94.7264	39.4641	67.0952	1.18429	0.288402	1.27559e-05	3.61418e-05	69.4821	5.60443	37.1855	18.3007	Y	Y	2	magenta
UMAG_10605	KIS69459	probable ADH3 - alcohol dehydrogenase III	233.392	101.684	167.538	1.17227	0.171485	2.74467e-12	1.67427e-11	144.212	12.3925	79.6503	15.77	Y	Y	2	magenta
UMAG_11400	KIS69755	probable Thiamin biosynthetic enzyme	11770.1	5185.86	8477.96	1.1712	0.112207	5.6259e-26	1.08487e-24	7715	432.339	4297.46	362.775	Y	Y	8	magenta
UMAG_01696	KIS70526	hypothetical protein	32.3442	13.379	22.8616	1.17054	0.338412	0.000173831	0.000408791	12.6766	2.80687	6.53964	1.77285	N	N	1	red
UMAG_00518	KIS72096	related to TRP4 - anthranilate phosphoribosyltransferase	243.625	107.03	175.328	1.16662	0.150917	3.67973e-15	2.9566e-14	111.16	7.87153	61.7833	5.14063	Y	Y	2	light-green
UMAG_04482	KIS67380	hypothetical protein	35.1817	14.4504	24.816	1.16243	0.375145	0.000598845	0.00129948	17.1421	5.18721	8.89497	4.11627	Y	Y	0.5	dark-green
UMAG_00668	KIS72256	related to SIP2 - subunit of the Snf1 serine/threonine protein kinase complex	235.9	103.5	169.7	1.15755	0.179536	3.93852e-11	2.14889e-10	57.2932	4.53788	32.1119	8.58448	Y	Y	12	cyan
UMAG_02957	KIS68978	hypothetical protein	215.879	94.9907	155.435	1.15721	0.174474	1.1345e-11	6.52616e-11	139.37	20.9537	77.9467	9.0812	Y	Y	8	light-cyan
UMAG_11708	KIS69813	related to DTD1 - D-Tyr-tRNA(Tyr) deacylase activity	151.18	67.0244	109.102	1.14637	0.175231	2.1328e-11	1.1898e-10	162.919	19.3423	91.4225	4.53121	Y	Y	2	yellow
UMAG_03011	KIS69031	hypothetical protein	144.797	64.5327	104.665	1.13752	0.175834	3.51844e-11	1.92294e-10	54.8263	4.59292	31.0912	4.00973	Y	Y	0.5	dark-green
UMAG_03689	KIS68110	related to TAD2 - subunit of tRNA-specific adenosine-34 deaminase	170.937	75.591	123.264	1.13745	0.213896	3.61447e-08	1.42723e-07	146.569	25.2102	82.1075	18.4473	Y	Y	0.5	red
UMAG_00756	KIS72351	probable GDI1 - GDP dissociation inhibitor	3629.86	1615.66	2622.76	1.13442	0.193029	1.44637e-09	6.70267e-09	1793.28	468.688	1008.9	95.3662	Y	Y	2	light-green
UMAG_10714	KIS67183	hypothetical protein	293.113	131.447	212.28	1.12939	0.178103	8.02437e-11	4.24549e-10	407.441	31.7609	231.429	47.9199	Y	Y	8	light-cyan
UMAG_05789	KIS67007	hypothetical protein	50.0706	21.7541	35.9123	1.12798	0.287718	3.04103e-05	8.12786e-05	61.2901	11.8371	33.9574	10.3537	Y	Y	0.5	dark-green
UMAG_00038	KIS71595	related to transaldolase	53.1386	23.3561	38.2473	1.1173	0.271601	1.37924e-05	3.88572e-05	26.0248	4.29989	14.682	3.97289	Y	Y	1	light-cyan
UMAG_00481	KIS72060	probable signal peptidase (endopeptidase SP18)	147.288	66.6812	106.984	1.11122	0.193492	3.36636e-09	1.49359e-08	186.25	25.336	106.898	14.8618	Y	Y	2	light-green
UMAG_01201	KIS71301	related to TMT1 - trans-aconitate methyltransferase	254.155	112.659	183.407	1.10248	0.281768	3.15383e-05	8.40502e-05	149.358	9.78985	84.238	41.834	Y	Y	4	magenta
UMAG_02332	KIS69811	hypothetical protein	77.5155	35.1992	56.3574	1.08912	0.237168	1.61823e-06	5.24787e-06	74.227	5.48029	42.512	12.0821	Y	Y	2	magenta
UMAG_11610	KIS71973	hypothetical protein	294.114	136.355	215.235	1.08258	0.175326	2.48277e-10	1.25498e-09	228.326	23.574	134.001	22.8514	Y	Y	4	magenta
UMAG_00283	KIS71855	hypothetical protein	204.57	94.732	149.651	1.07597	0.201382	3.40606e-08	1.35154e-07	114.937	11.4739	67.3272	16.7359	Y	Y	8	cyan
UMAG_10816	KIS70385	hypothetical protein	1120.16	518.471	819.316	1.07235	0.209431	1.13549e-07	4.19158e-07	1239.9	188.665	722.615	168.039	Y	Y	2	cyan
UMAG_04910	KIS67038	hypothetical protein	235.056	106.886	170.971	1.06724	0.280526	5.134e-05	0.000132134	105.047	14.603	60.203	26.944	Y	Y	12	light-cyan
UMAG_04285	KIS67790	probable isocitrate lyase	2068.67	962.625	1515.65	1.06538	0.207159	1.01986e-07	3.78856e-07	871.501	103.222	511.047	150.209	Y	Y	1	red
UMAG_10067	KIS69651	hypothetical protein	40.0304	18.1554	29.0929	1.06188	0.294892	0.000119153	0.000287749	40.8936	7.13956	23.5816	5.22907	Y	Y	4	magenta
UMAG_00842	KIS70914	probable aflatoxin efflux pump AFLT	59.0282	27.0288	43.0285	1.0615	0.270255	3.22829e-05	8.58221e-05	22.9469	4.51142	13.3945	3.54405	N	N	0.5	light-cyan
UMAG_01026	KIS71114	hypothetical protein	555.765	261.984	408.874	1.05978	0.167171	8.95609e-11	4.71527e-10	161.596	6.95791	96.7593	22.2263	Y	Y	1	magenta
UMAG_10483	KIS68096	related to SPS19 û peroxisomal 2	92.1378	43.0273	67.5825	1.05757	0.212577	2.54636e-07	8.97708e-07	75.5546	7.43226	44.9274	8.77504	Y	Y	1	dark-green
UMAG_11675	KIS70321	hypothetical protein	21.2971	9.35338	15.3252	1.05586	0.385324	0.00220848	0.00438843	39.7375	8.76592	22.0604	4.81568	Y	Y	0.5	red
UMAG_01436	KIS71543	hypothetical protein	58.0494	26.759	42.4042	1.04954	0.272669	4.52892e-05	0.000117686	24.7535	5.69906	14.4618	4.08398	Y	Y	6	cyan
UMAG_06285	KIS70194	related to carbamoyl-phosphate synthase small chain	603.751	286.708	445.23	1.04838	0.172375	4.64782e-10	2.28674e-09	284.26	10.4599	170.174	35.9222	Y	Y	4	red
UMAG_01971	KIS70823	hypothetical protein	308.694	146.955	227.825	1.04609	0.168505	2.12037e-10	1.08025e-09	489.389	65.9719	295.439	37.3295	Y	Y	0.5	light-cyan
UMAG_03172	KIS68601	zinc-finger transcription factor	1022.3	480.135	751.219	1.03288	0.252808	1.69144e-05	4.71386e-05	565.36	60.5552	337.493	137.362	Y	Y	0.5	red
UMAG_02011	KIS70866	hypothetical protein	24.4017	10.7456	17.5737	1.03149	0.408416	0.00415454	0.00785825	7.68271	3.7001	4.37095	0.736178	N	N	2	magenta
UMAG_11050	KIS67966	Ras-GTPase	302.328	145.113	223.72	1.03014	0.18032	4.47302e-09	1.94847e-08	314.719	38.7114	191.336	38.8456	Y	Y	8	magenta
UMAG_05509	KIS66516	related to RRP1 - involved in processing rRNA precursor species to mature rRNAs	290.915	139.082	214.999	1.02899	0.201338	1.27945e-07	4.68553e-07	132.809	31.293	80.0702	13.2388	N	N	1	red
UMAG_01870	KIS70714	related to glutathione-S-transferase	294.667	142.221	218.444	1.02898	0.155413	1.46212e-11	8.31451e-11	237.625	10.0972	145.412	25.8536	Y	Y	4	light-cyan
UMAG_02753	KIS69422	hypothetical protein	23.8644	10.7115	17.2879	1.02253	0.379298	0.00263771	0.00516353	21.0376	4.64286	11.9529	4.53786	N	Y	8	cyan
UMAG_02385	KIS69869	probable phospho-2-dehydro-3-deoxyheptonate aldolase	497.82	242.342	370.081	1.02212	0.138889	7.59053e-14	5.41223e-13	283.253	23.607	174.292	16.3062	Y	Y	4	cyan
UMAG_12178	KIS70882	related to 5-carboxyvanillate decarboxylase	298.354	144.227	221.29	1.02111	0.178397	4.23334e-09	1.85155e-08	200.137	36.164	122.284	15.7889	Y	Y	12	magenta
UMAG_04961	KIS67092	hypothetical protein	771.694	376.362	574.028	1.00343	0.190309	5.57268e-08	2.14794e-07	83.2144	16.2563	51.5597	11.7688	N	Y	2	magenta
